# Supplementary material for: Exploring catecholase activity in dinuclear Mn(ii) and Cu(ii) complexes: an experimental and theoretical approach
Source: Royal Society of Chemistry journal article supplement (doi:10.1039/d0nj00605j), 2020-01-01
Supplement: d0nj00605j1.pdf [file d0nj00605j1.pdf]

Electronic supplementary information (ESI)

## Exploring catecholase activity in dinuclear Mn(II) and Cu(II) complexes: An experimental and theoretical approach

M. Shahwaz Ahmad<sup>a</sup>, Mohd Khalid<sup>a\*</sup>, M. Shahnawaz Khan<sup>a</sup>, M. Shahid<sup>a</sup>,  
Musheer Ahmad<sup>b</sup>, Monika<sup>c</sup>, Azaj Ansari<sup>c</sup>, Mo Ashafaq<sup>a</sup>

<sup>a</sup>Department of Chemistry, Aligarh Muslim University, Aligarh 202002

<sup>b</sup>Department of Applied Chemistry, Aligarh Muslim University, Aligarh 202002

<sup>c</sup>Department of Chemistry, Central University of Haryana, Mahendergarh-123031,  
Haryana, India

\*Corresponding author, Email: khalid215@gmail.com

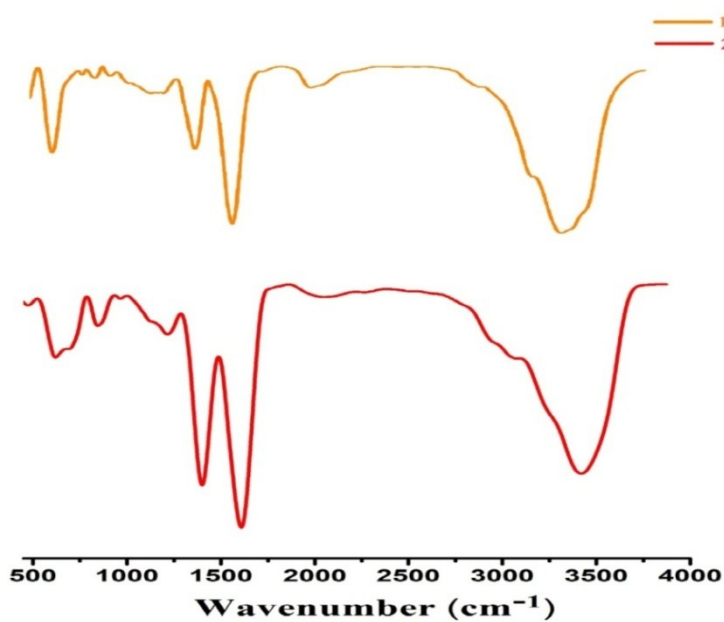

Fig. S1. FTIR spectra of **1** and **2**.

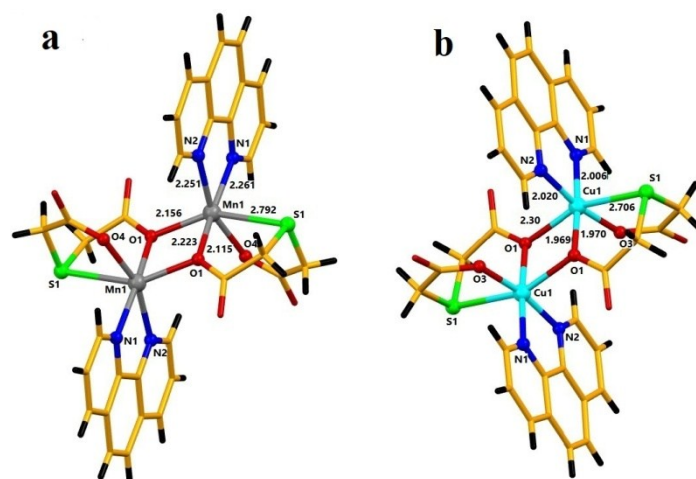

**Fig. S2.** Selected bond distances and bond angles for **1** and **2**.

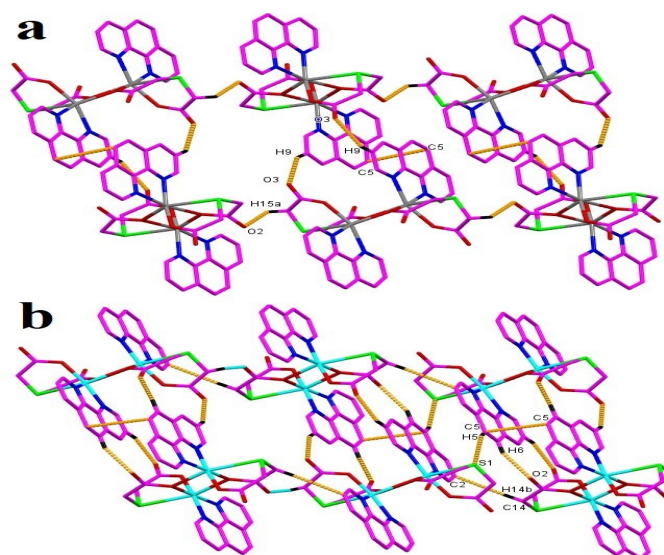

**Fig. S3.** (a) Formation of a 2D sheet network as a result of  $O\cdots H$  and  $\pi\cdots\pi$  interactions in **1**. (b) Formation of a 2D sheet network through  $O\cdots H$ ,  $S\cdots H$ ,  $C-H\cdots\pi$  and  $\pi\cdots\pi$  interactions in **2**.

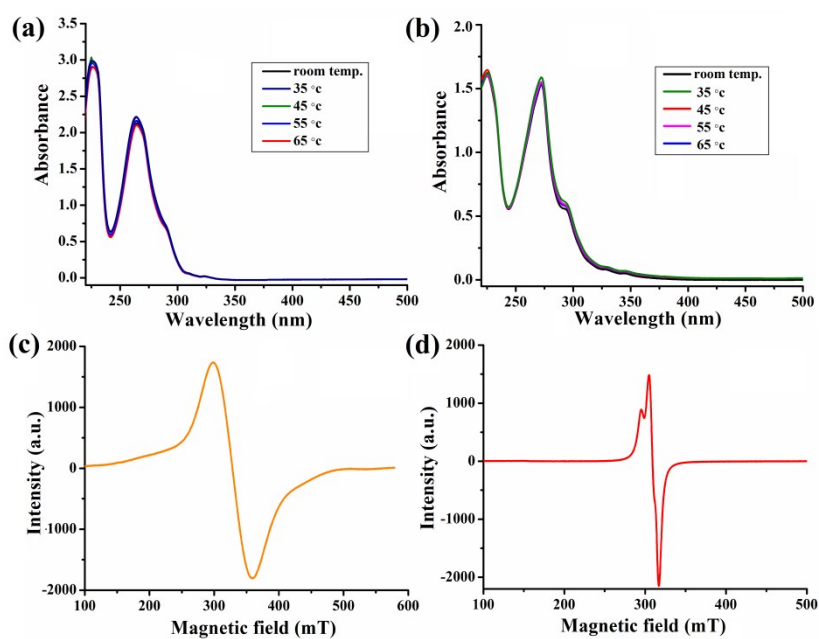

**Fig. S4.** Thermal UV-visible spectra of **1** (a) and **2** (b) and EPR spectra for **1** (c) and **2** (d).

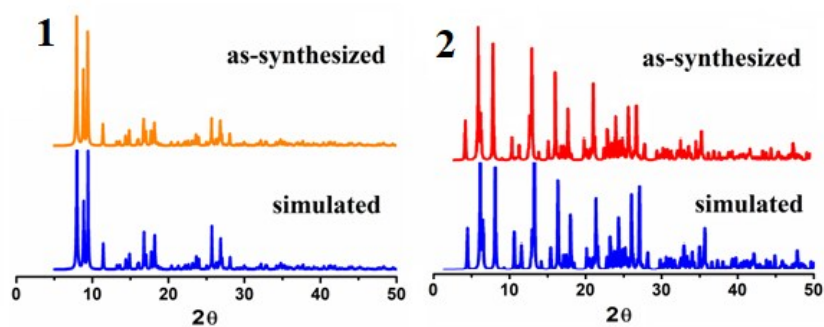

**Fig. S5.** As-synthesized and simulated PXRD patterns for **1** and **2**.

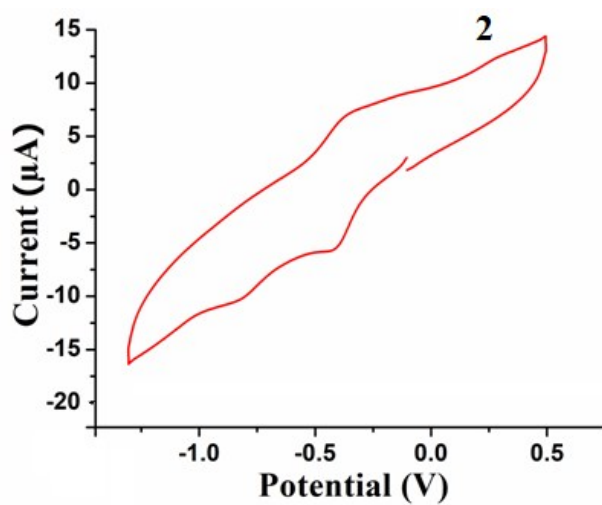

**Fig. S6.** Cyclic voltammogram of **2** obtained at a  $100 \text{ mVs}^{-1}$  scan rate.

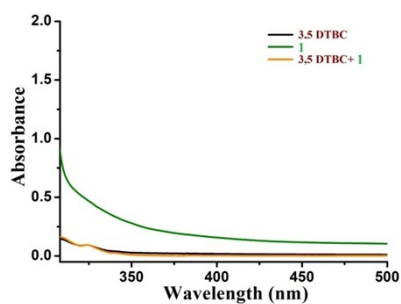

**Fig. S7.** Time-dependent UV-vis spectra for **1** ( $10^{-4}$  M) upon the addition of (100-fold) 3,5-DTBC ( $10^{-2}$  M) in MeOH at 298 K.

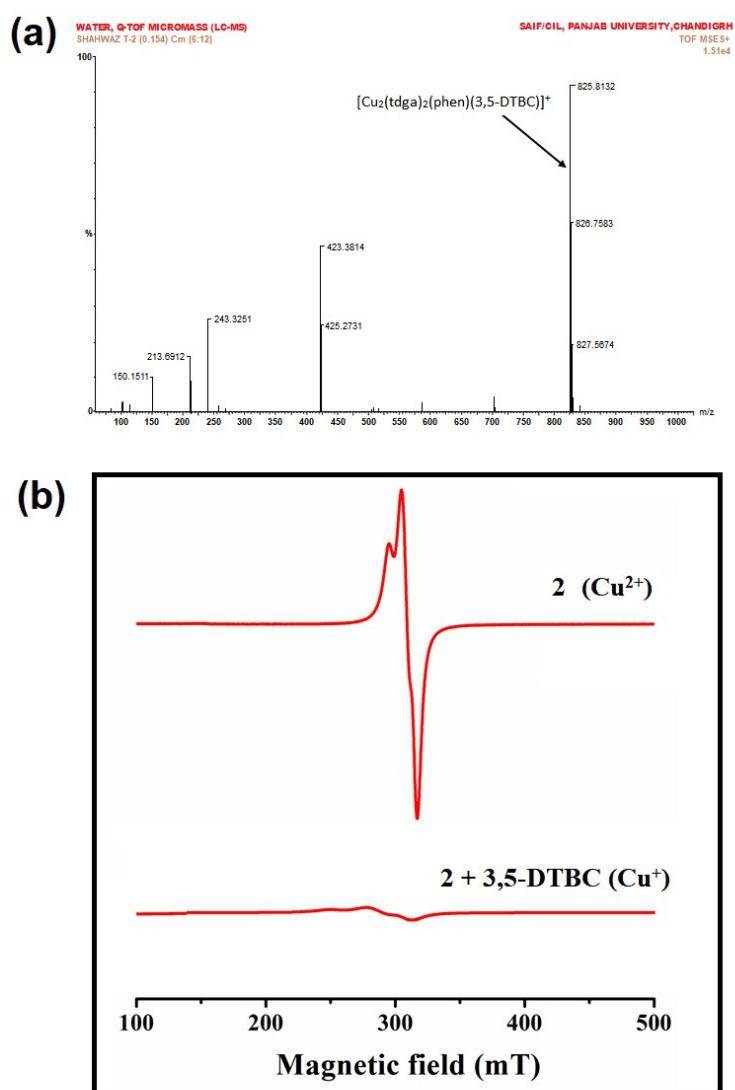

**Fig. S8.** (a) ESI-MS spectrum (positive mode) of a mixture of **2** and 3,5-DTBC recorded in methanol. (b) EPR spectrum of the complex and before and after mixing 3,5-DTBC.

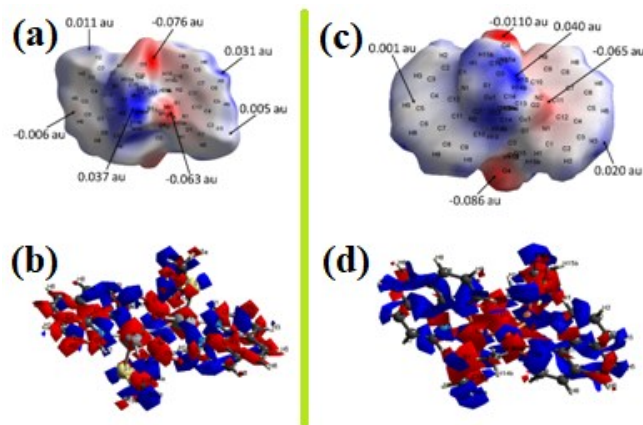

**Fig. S9.** The ESP map front view and 3D-deformation density map showing the presence of CD regions (in red) and CC regions (in blue). The iso surfaces are drawn at 0.008 for **1** (a, b), **2** (c, d).

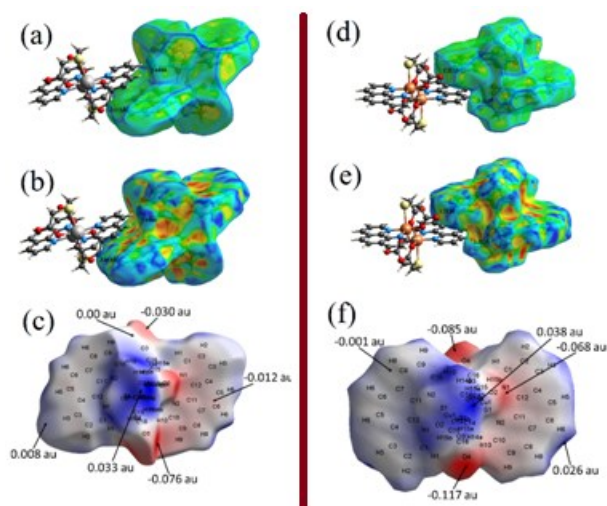

**Fig. S10.** Intermolecular O $\cdots$ H interactions through red spots shown by Hirshfeld surface mapping over (a) curvedness, (b) shape index and the ESP back view for **1** (a), (b) and (c) and **2** (d), (e) and (f).

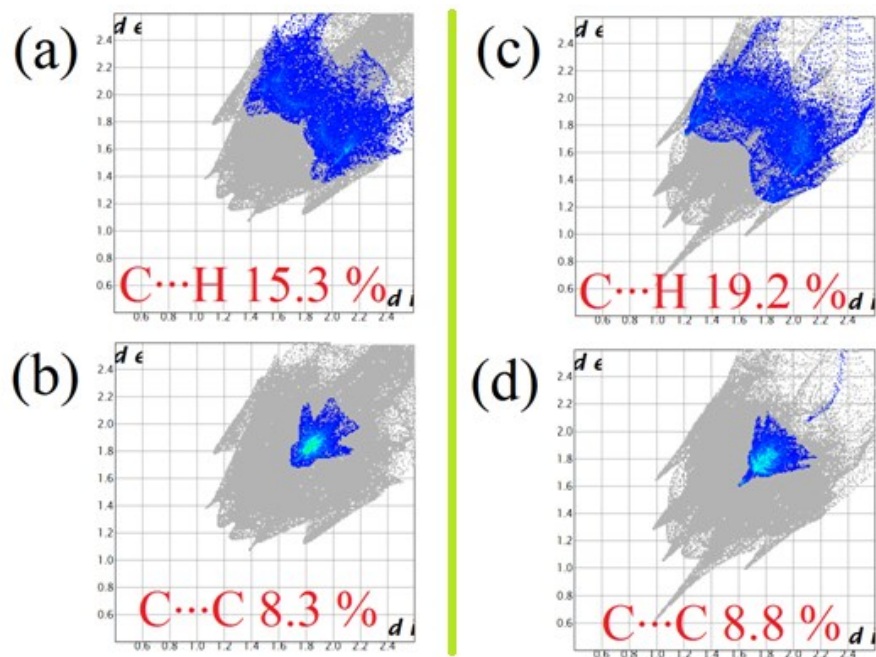

**Fig. S11.** The 2D-fingerprint plots of **1** (a) and (b), **2** (c), and (d) for showing different interactions.

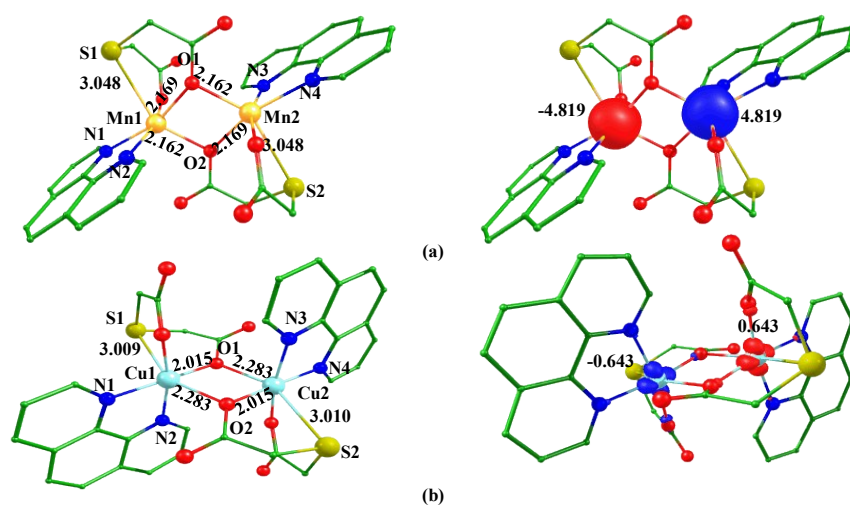

**Fig. S12.** B3LYP (a) optimized structure (left) and its spin density (right) plot of **1**<sub>(hs,hs)</sub> and (b) optimized structure (left) and its spin density plot (right) of the **2**.

**Table. 1S Bond Lengths for 1.**

| <b>Atom</b> | <b>Atom</b>     | <b>Length/Å</b> | <b>Atom</b> | <b>Atom</b> | <b>Length/Å</b> |
|-------------|-----------------|-----------------|-------------|-------------|-----------------|
| Mn1         | S1              | 2.793 (4)       | C1          | C2          | 1.384 (12)      |
| Mn1         | O1 <sup>1</sup> | 2.155 (6)       | C3          | C2          | 1.376 (13)      |
| Mn1         | O1              | 2.223 (6)       | C4          | C3          | 1.411 (13)      |
| Mn1         | O4              | 2.115 (7)       | C4          | C5          | 1.440 (11)      |
| Mn1         | N1              | 2.260 (7)       | C6          | C5          | 1.336 (13)      |
| Mn1         | N2              | 2.251 (6)       | C7          | C6          | 1.445 (12)      |
| S1          | C14             | 1.837 (10)      | C7          | C8          | 1.411 (13)      |
| S1          | C15             | 1.777 (12)      | C8          | C9          | 1.366 (14)      |
| O1          | C13             | 1.276 (11)      | C10         | C9          | 1.391 (13)      |
| O3          | C16             | 1.248 (13)      | C11         | C7          | 1.429 (10)      |
| O4          | C16             | 1.292 (14)      | C11         | C12         | 1.443 (10)      |
| N1          | C1              | 1.353 (10)      | C12         | C4          | 1.419 (10)      |
| N1          | C12             | 1.359 (9)       | C13         | O2          | 1.223 (10)      |
| N2          | C10             | 1.341 (10)      | C13         | C14         | 1.515 (14)      |
| N2          | C11             | 1.369 (9)       | C16         | C15         | 1.516 (18)      |

**Table. 2S** Bond Lengths for **2**.



| Atom | Atom            | Length/Å    | Atom | Atom             | Length/Å  |
|------|-----------------|-------------|------|------------------|-----------|
| Cu1  | S1              | 2.7081 (7)  | C3   | C4               | 1.407 (4) |
| Cu1  | O1              | 1.9687 (18) | C4   | C5               | 1.431 (4) |
| Cu1  | O1 <sup>1</sup> | 2.2997 (17) | C4   | C12              | 1.401 (4) |
| Cu1  | O3              | 1.9704 (18) | C5   | C6               | 1.349 (4) |
| Cu1  | N1              | 2.008 (2)   | C6   | C7               | 1.436 (4) |
| Cu1  | N2              | 2.020 (2)   | C7   | C8               | 1.400 (4) |
| S1   | C14             | 1.804 (3)   | C7   | C11              | 1.405 (4) |
| S1   | C15             | 1.802 (3)   | C8   | C9               | 1.370 (4) |
| O1   | C13             | 1.289 (3)   | C9   | C10              | 1.406 (4) |
| O2   | C13             | 1.223 (3)   | C11  | C12              | 1.426 (4) |
| O3   | C16             | 1.264 (3)   | C13  | C14              | 1.526 (4) |
| O4   | C16             | 1.251 (3)   | C15  | C16              | 1.524 (4) |
| N1   | C1              | 1.326 (3)   | S2   | C17              | 1.820 (3) |
| N1   | C12             | 1.354 (3)   | S2   | C17 <sup>2</sup> | 1.820 (3) |
| N2   | C10             | 1.325 (3)   | O5   | C18              | 1.212 (3) |
| N2   | C11             | 1.360 (3)   | O6   | C18              | 1.324 (3) |
| C1   | C2              | 1.401 (4)   | C17  | C18              | 1.499 (4) |
| C2   | C3              | 1.367 (4)   |      |                  |           |

**Table. 3S Bond Angles for 1.**

| Atom            | Atom | Atom             | Angle/°     | Atom | Atom | Atom | Angle/°    |
|-----------------|------|------------------|-------------|------|------|------|------------|
| O1 <sup>1</sup> | Mn1  | S1               | 148.91 (17) | C1   | C2   | C3   | 119.0 (8)  |
| O1              | Mn1  | S1               | 74.66 (18)  | C2   | C3   | C4   | 120.0 (8)  |
| O1              | Mn1  | N1               | 167.9 (2)   | C3   | C4   | C12  | 117.6 (7)  |
| O1 <sup>1</sup> | Mn1  | N1               | 113.1 (3)   | C5   | C4   | C3   | 123.3 (7)  |
| O4              | Mn1  | S1               | 75.4 (2)    | C5   | C4   | C12  | 119.1 (8)  |
| O4              | Mn1  | O1 <sup>1</sup>  | 94.9 (3)    | C6   | C5   | C4   | 121.6 (7)  |
| O4              | Mn1  | O1               | 93.7 (3)    | C5   | C6   | C7   | 121.3 (7)  |
| O4              | Mn1  | N1               | 92.6 (2)    | C6   | C7   | C11  | 119.1 (8)  |
| O4              | Mn1  | N2               | 160.0 (3)   | C8   | C7   | C6   | 124.3 (7)  |
| N1              | Mn1  | S1               | 97.0 (2)    | C8   | C7   | C11  | 116.6 (8)  |
| N2              | Mn1  | S1               | 90.44 (19)  | C9   | C8   | C7   | 119.6 (8)  |
| N2              | Mn1  | O1               | 96.1 (2)    | C10  | C9   | C8   | 121.1 (9)  |
| N2              | Mn1  | O1 <sup>1</sup>  | 104.3 (2)   | C9   | C10  | N2   | 121.3 (9)  |
| N2              | Mn1  | N1               | 74.9 (2)    | C7   | C11  | N2   | 122.3 (7)  |
| C14             | S1   | Mn1              | 93.8 (4)    | C7   | C11  | C12  | 119.1 (7)  |
| C15             | S1   | Mn1              | 95.3 (5)    | C12  | C11  | N2   | 118.5 (6)  |
| C15             | S1   | C14              | 99.9 (5)    | C4   | C12  | N1   | 121.9 (7)  |
| C13             | O1   | Mn1 <sup>1</sup> | 125.0 (5)   | C4   | C12  | C11  | 119.6 (6)  |
| C13             | O1   | Mn1              | 127.2 (6)   | C11  | C12  | N1   | 118.4 (6)  |
| C16             | O4   | Mn1              | 129.1 (7)   | O2   | C13  | O1   | 124.7 (10) |
| C1              | N1   | Mn1              | 127.6 (5)   | C14  | C13  | O1   | 116.4 (8)  |
| C1              | N1   | C12              | 118.4 (6)   | C14  | C13  | O2   | 118.8 (10) |
| C12             | N1   | Mn1              | 114.0 (5)   | C13  | C14  | S1   | 114.7 (7)  |
| C10             | N2   | Mn1              | 127.1 (5)   | C16  | C15  | S1   | 117.1 (8)  |
| C10             | N2   | C11              | 118.9 (7)   | O4   | C16  | O3   | 121.1 (15) |
| C11             | N2   | Mn1              | 113.9 (5)   | C15  | C16  | O3   | 117.0 (14) |
| C2              | C1   | N1               | 123.2 (8)   | C15  | C16  | O4   | 121.9 (9)  |

**Table. 4S** Bond Angles for **2**.

| Atom            | Atom | Atom             | Angle/°     | Atom             | Atom | Atom | Angle/°     |
|-----------------|------|------------------|-------------|------------------|------|------|-------------|
| O1              | Cu1  | S1               | 81.09 (5)   | C12              | C4   | C3   | 117.2 (2)   |
| O1 <sup>1</sup> | Cu1  | S1               | 157.70 (5)  | C12              | C4   | C5   | 118.4 (2)   |
| O3              | Cu1  | S1               | 80.90 (5)   | C6               | C5   | C4   | 121.8 (2)   |
| O3              | Cu1  | O1               | 92.37 (8)   | C7               | C6   | C5   | 120.8 (2)   |
| O3              | Cu1  | O1 <sup>1</sup>  | 91.71 (7)   | C8               | C7   | C6   | 124.6 (2)   |
| N1              | Cu1  | S1               | 102.06 (6)  | C11              | C7   | C6   | 118.6 (2)   |
| N1              | Cu1  | O1               | 175.58 (8)  | C11              | C7   | C8   | 116.8 (2)   |
| N1              | Cu1  | O1 <sup>1</sup>  | 99.08 (7)   | C9               | C8   | C7   | 119.8 (2)   |
| N1              | Cu1  | O3               | 91.19 (8)   | C10              | C9   | C8   | 119.8 (3)   |
| N2              | Cu1  | S1               | 93.42 (6)   | C9               | C10  | N2   | 121.8 (3)   |
| N2              | Cu1  | O1               | 94.81 (8)   | C7               | C11  | N2   | 123.3 (2)   |
| N2              | Cu1  | O1 <sup>1</sup>  | 96.47 (7)   | C12              | C11  | N2   | 116.6 (2)   |
| N2              | Cu1  | O3               | 170.06 (8)  | C12              | C11  | C7   | 120.2 (2)   |
| N2              | Cu1  | N1               | 81.98 (9)   | C4               | C12  | N1   | 123.1 (2)   |
| C14             | S1   | Cu1              | 90.24 (9)   | C11              | C12  | N1   | 116.7 (2)   |
| C15             | S1   | Cu1              | 90.49 (9)   | C11              | C12  | C4   | 120.2 (2)   |
| C15             | S1   | C14              | 103.25 (13) | O2               | C13  | O1   | 124.6 (2)   |
| C13             | O1   | Cu1              | 125.19 (16) | C14              | C13  | O1   | 117.9 (2)   |
| C13             | O1   | Cu1 <sup>1</sup> | 126.57 (16) | C14              | C13  | O2   | 117.3 (2)   |
| C16             | O3   | Cu1              | 126.68 (17) | C13              | C14  | S1   | 118.15 (19) |
| C1              | N1   | Cu1              | 128.90 (18) | C16              | C15  | S1   | 118.28 (18) |
| C12             | N1   | Cu1              | 112.59 (16) | O4               | C16  | O3   | 123.0 (2)   |
| C12             | N1   | C1               | 118.5 (2)   | C15              | C16  | O3   | 121.8 (2)   |
| C10             | N2   | Cu1              | 129.28 (18) | C15              | C16  | O4   | 115.2 (2)   |
| C11             | N2   | Cu1              | 111.92 (17) | C17 <sup>2</sup> | S2   | C17  | 93.74 (18)  |
| C11             | N2   | C10              | 118.6 (2)   | C18              | C17  | S2   | 115.3 (2)   |
| C2              | C1   | N1               | 122.0 (3)   | O6               | C18  | O5   | 124.2 (3)   |
| C3              | C2   | C1               | 120.0 (3)   | C17              | C18  | O5   | 125.2 (3)   |
| C4              | C3   | C2               | 119.1 (2)   | C17              | C18  | O6   | 110.5 (2)   |
| C5              | C4   | C3               | 124.4 (2)   |                  |      |      |             |

**Table S5.** Possible spin interactions of the **1**.

| Electronic Configurations |         |         |
|---------------------------|---------|---------|
| Spin States               | Metal 1 | Metal 2 |
| $\Pi_1^{1(hs,hs)}$        | ↑↑↑↑↑   | ↑↑↑↑↑   |

**Table S6.** Computed selected structural parameters of **1** and **2**.

|                                    | Bond lengths(Å) |        |        |        |        |        |        |        |        |       | Bond angle (°) |            |            |           |           |
|------------------------------------|-----------------|--------|--------|--------|--------|--------|--------|--------|--------|-------|----------------|------------|------------|-----------|-----------|
|                                    | Mn1-Mn2         | Mn1-O1 | O1-Mn2 | Mn1-O2 | O2-Mn2 | Mn1-N1 | Mn1-N2 | Mn2-N3 | Mn2-N4 | Mn1-S | Mn2-S          | Mn1-O1-Mn2 | Mn1-O2-Mn2 | N1-Mn1-N2 | N1-Mn2-N2 |
| <sup>11</sup> I <sub>(hs,hs)</sub> | 3.367           | 2.171  | 2.162  | 2.162  | 2.171  | 2.255  | 2.268  | 2.268  | 2.255  | 3.046 | 3.046          | 101.9      | 101.9      | 74.0      | 74.0      |
| <sup>1</sup> I <sub>(hs,hs)</sub>  | 3.364           | 2.169  | 2.162  | 2.162  | 2.169  | 2.255  | 2.268  | 2.268  | 2.255  | 3.048 | 3.048          | 101.8      | 101.8      | 74.0      | 74.0      |
| <sup>7</sup> I <sub>(is,is)</sub>  | 3.384           | 2.301  | 1.999  | 1.999  | 2.301  | 2.025  | 1.997  | 1.997  | 2.025  | 2.926 | 2.926          | 103.5      | 103.5      | 81.0      | 81.0      |
| <sup>1</sup> I <sub>(is,is)</sub>  | 3.392           | 2.304  | 1.998  | 1.998  | 2.304  | 2.025  | 1.996  | 1.996  | 2.025  | 2.927 | 2.927          | 103.8      | 103.8      | 81.0      | 81.0      |
| <sup>3</sup> I <sub>(ts,ts)</sub>  | 3.275           | 2.064  | 2.104  | 2.201  | 2.012  | 2.005  | 2.031  | 2.038  | 2.016  | 2.917 | 2.576          | 103.5      | 101.9      | 80.8      | 80.7      |
| <sup>1</sup> I <sub>(ts)</sub>     | 3.4             | 2.9    | 2.7    | 2.6    | 2.8    | 2.2    | 2.1    | 2.0    | 2.2    | 2.5   | 2.5            | 15         | 106        | 80.7      | 80.7      |

  

|               | Cu1-Cu2      | Cu1-O1 | O1-Cu2 | Cu1-O2 | O2_Cu2 | Cu1_N1 | Cu1_N2 | Cu2_N3 | Cu2_N4 | Cu1_S | Cu2_S | Cu1-O1-Cu2 | Cu1-O2-Cu2 | N1-Cu1-N2 | N1-Cu2-N2 |
|---------------|--------------|--------|--------|--------|--------|--------|--------|--------|--------|-------|-------|------------|------------|-----------|-----------|
|               | <sup>2</sup> | 3.332  | 2.015  | 2.282  | 2.282  | 2.015  | 2.067  | 2.067  | 2.067  | 2.066 | 3.009 | 3.009      | 101.4      | 101.4     | 80.4      |
| <sup>12</sup> | 3.332        | 2.015  | 2.283  | 2.283  | 2.015  | 2.066  | 2.067  | 2.067  | 2.066  | 3.009 | 3.010 | 101.4      | 101.4      | 80.4      | 80.4      |

Table S7. Computed spin densities of 1 and 2.

| <b>Spin States</b> | <b>Mn1</b>    | <b>Mn2</b>    |
|--------------------|---------------|---------------|
| $^{11}1_{(hs,hs)}$ | <b>4.806</b>  | <b>4.806</b>  |
| $^11_{(hs,hs)}$    | <b>4.819</b>  | <b>-4.819</b> |
| $^71_{(is,is)}$    | <b>3.261</b>  | <b>3.261</b>  |
| $^11_{(is,is)}$    | <b>3.267</b>  | <b>-3.267</b> |
| $^31_{(ls,ls)}$    | <b>1.068</b>  | <b>1.068</b>  |
| $^11_{(ls,ls)}$    | <b>1.075</b>  | <b>-1.075</b> |
|                    | <b>Cu1</b>    | <b>Cu2</b>    |
| $^32$              | <b>0.641</b>  | <b>0.641</b>  |
| $^12$              | <b>-0.643</b> | <b>0.643</b>  |
